# Supplementary material
Source: Elsevier journal article supplement (https://comptes-rendus.academie-sciences.fr/chimie/article/10.1016/j.crci.2017.07.004/file/attach/mmc1.pdf)
Supplement: mmc1 [file mmc1.pdf]

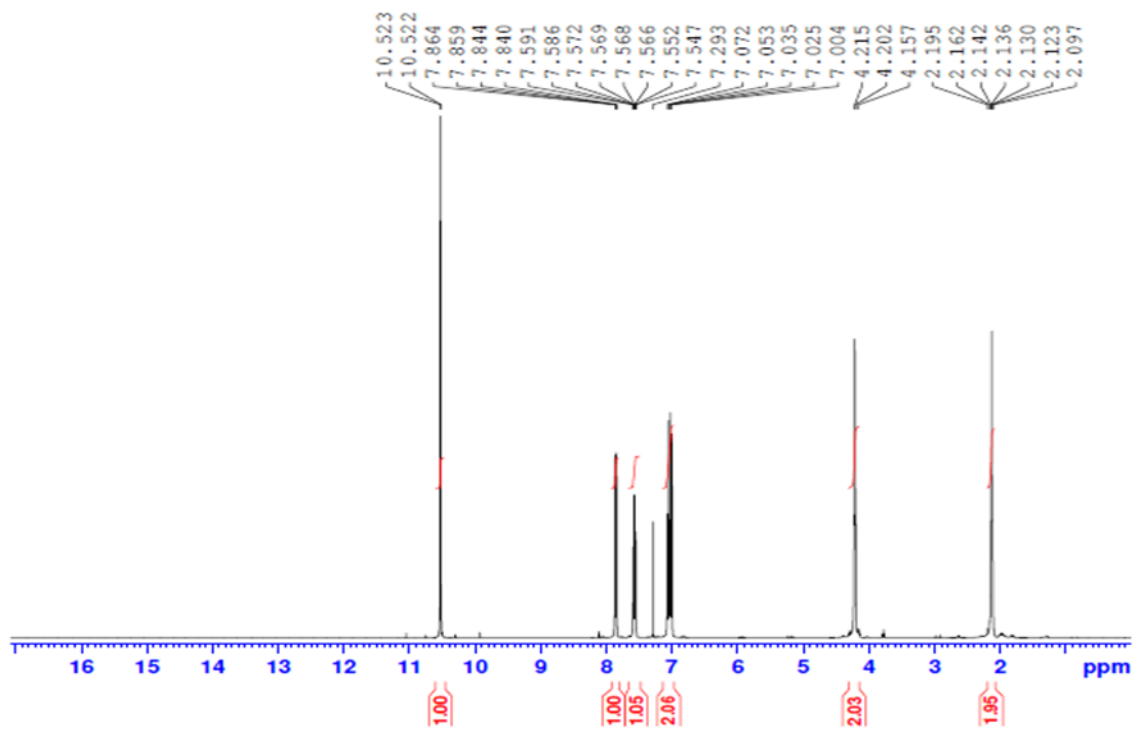

Figure S1. The  $^1\text{H}$ NMR of 1,4-bis(2-carboxyaldehyde phenoxy)butane in  $\text{CDCl}_3$

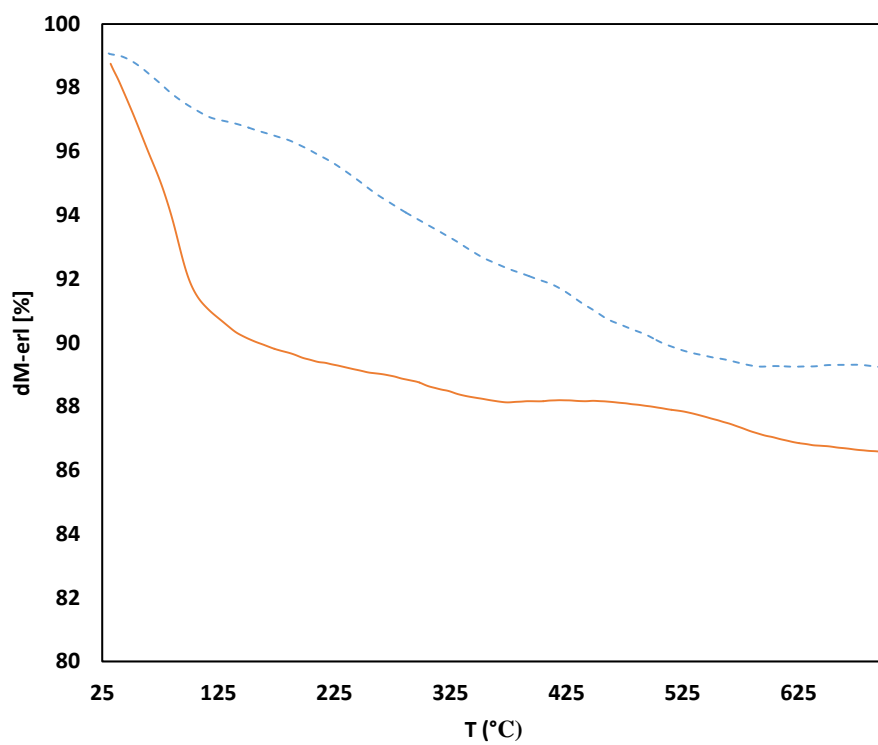

Figure S2. Thermogravimetric investigation of Fe<sub>3</sub>O<sub>4</sub> (solid line) and Fe<sub>3</sub>O<sub>4</sub>@SiO<sub>2</sub>-(CH<sub>2</sub>)<sub>3</sub>-PBSB/MoO<sub>2</sub> (dashed line)
